# Supplementary material for: Biocompatible, porous hydrogels composed of aliphatic polyesters and poly(2-isopropenyl-2-oxazoline). Their application as scaffolds for bone tissue regeneration
Source: Royal Society of Chemistry journal article supplement (doi:10.1039/d4sm00615a), 2024-01-01
Supplement: d4sm00615a2.pdf [file d4sm00615a2.pdf]

## Supporting information

### **Biocompatible, porous hydrogels composed of aliphatic polyesters and poly(2-isopropenyl-2-oxazoline). Their application as scaffolds for bone tissue regeneration.**

Bartosz Kopka, Bartłomiej Kost, Andrzej Pawlak, Irena Bąk-Sypień, Marek Brzeziński, Agata Tomaszewska, Agnieszka Krupa, Piotr Józwiak, Malgorzata Basko\*

|                                                                                                                                                                                                                            |   |
|----------------------------------------------------------------------------------------------------------------------------------------------------------------------------------------------------------------------------|---|
| Movie 1.....                                                                                                                                                                                                               | 1 |
| Scheme S1. Preparation of porous PiPOx-polyester networks using the NaCl leaching technique.....                                                                                                                           | 2 |
| Figure S1. NaCl crystals used as a porogen in the preparation of porous PiPOx-polyester networks: A) 50-150 $\mu\text{m}$ (SEM picture), B) 270-560 $\mu\text{m}$ (SEM picture), C) 3.2-6.2 mm (digital picture).....      | 2 |
| Table S1. Fabrication of porous PiPOx-polyester networks in the presence of NaCl crystals....                                                                                                                              | 2 |
| Figure S2. SEM images of PiPOx-polyester networks: non-porous (bulky) and porous obtained in the presence of porogen: "A" and "B". Digital pictures of PiPOx-polyester networks prepared in the presence of porogen C..... | 3 |
| Figure S3. ATR FT-IR spectra of porous networks (dry state) obtained from PiPOx using HOOC-PLA <sub>3000</sub> -COOH and HOOC-PCL <sub>3000</sub> -COOH as crosslinker.....                                                | 4 |
| Figure S4. <sup>13</sup> C-CP/MAS spectra of porous networks (dry state) obtained from HOOC-PLA <sub>3000</sub> -COOH and HOOC-PCL <sub>3000</sub> -COOH as PiPOx crosslinker. ....                                        | 4 |
| Figure S5. Swelling of porous PiPOx-PCL and PiPOx-PLA networks in water, A) networks obtained with salt A, B) networks obtained with salt B and hydroxyapatite.....                                                        | 5 |
| Figure S6. TGA analysis of PiPOx-PLA and PiPOx-PCL porous networks with hydroxyapatite particles. ....                                                                                                                     | 5 |
| Figure S7. Krypton adsorption isotherms for porous PiPOx-PCL networks prepared with salt "A" and "B". ....                                                                                                                 | 6 |

#### Movie 1.

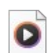

Movie 1.mp4

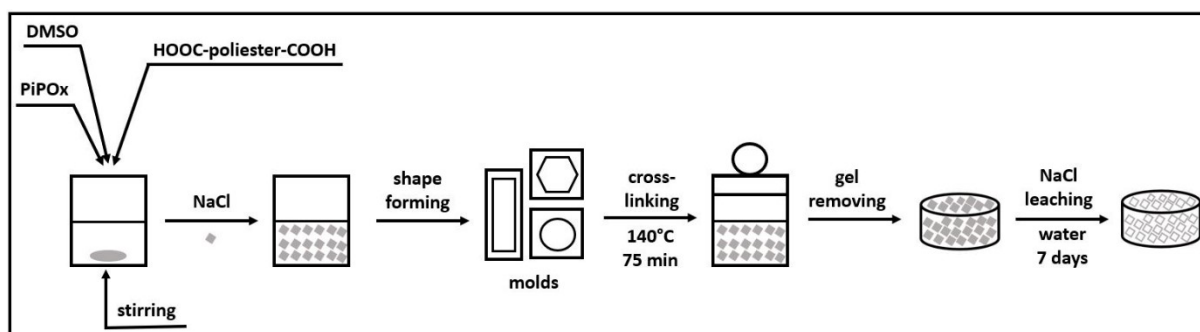

Scheme S1. Preparation of porous PiPOx-polyester networks using the NaCl leaching technique.

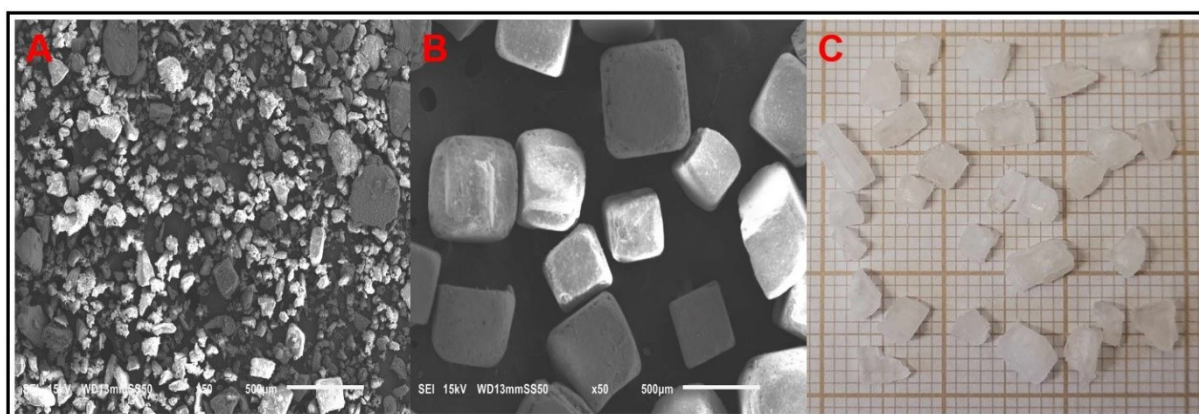

Figure S1. NaCl crystals used as a porogen in the preparation of porous PiPOx-polyester networks: A) 50-150  $\mu\text{m}$  (SEM picture), B) 270-560  $\mu\text{m}$  (SEM picture), C) 3.2-6.2 mm (digital picture).

Table S1. Fabrication of porous PiPOx-polyester networks in the presence of NaCl crystals.

Conditions:  $T=140\text{ }^{\circ}\text{C}$ , time= 75 min.

| Network code | Polyester <sup>a</sup><br>(mg) | PiPOx <sup>b</sup><br>(mg) | DMSO<br>(mL) | NaCl  |       |       | Shape    |
|--------------|--------------------------------|----------------------------|--------------|-------|-------|-------|----------|
|              |                                |                            |              | A [g] | B [g] | C [g] |          |
| PiPOx-PLA    | 44                             | 83                         | 1.0          | 3     | 3     | 3     | disc     |
|              | 132                            | 249                        | 3.0          | ----  | 11    | ----  | cylinder |
| PiPOx-PCL    | 44                             | 83                         | 1.0          | 3     | 3     | 3     | disc     |
|              | 132                            | 249                        | 3.0          | ----  | 11    | ----  | cylinder |

<sup>a</sup> polyester:  $M_n=3\ 000\ \text{g/mol}$ , <sup>b</sup> PiPOx:  $M_n=150\ 000\ \text{g/mol}$ ,

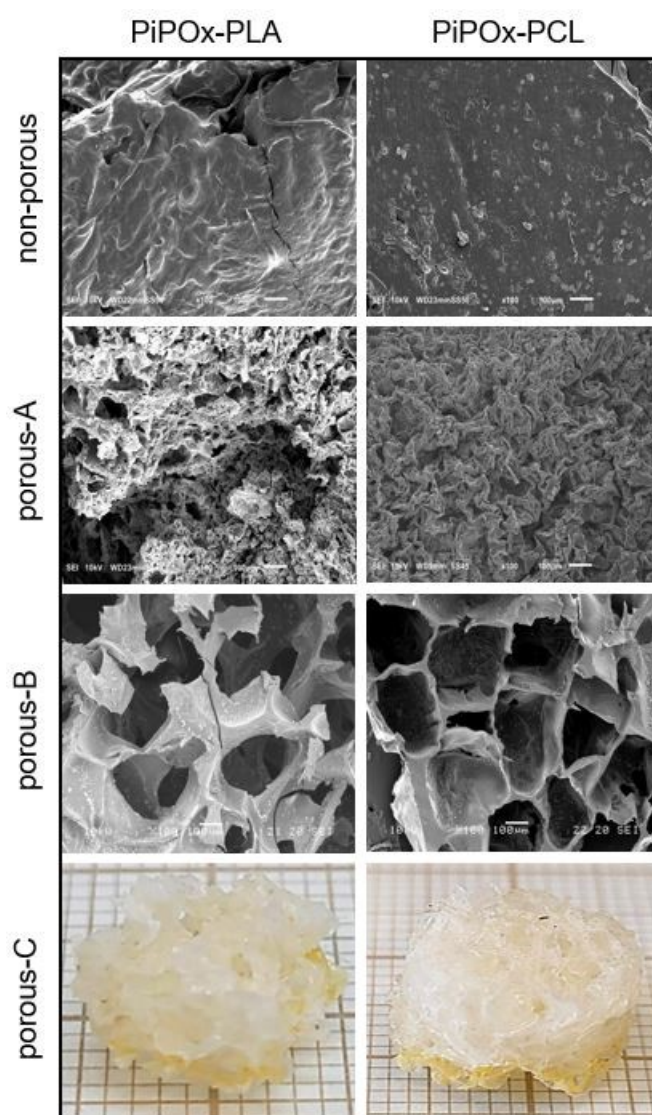

Figure S2. SEM images of PiPOx-polyester networks: non-porous (bulky) and porous obtained in the presence of porogen: “A” and “B”. Digital pictures of PiPOx-polyester networks prepared in the presence of porogen C.

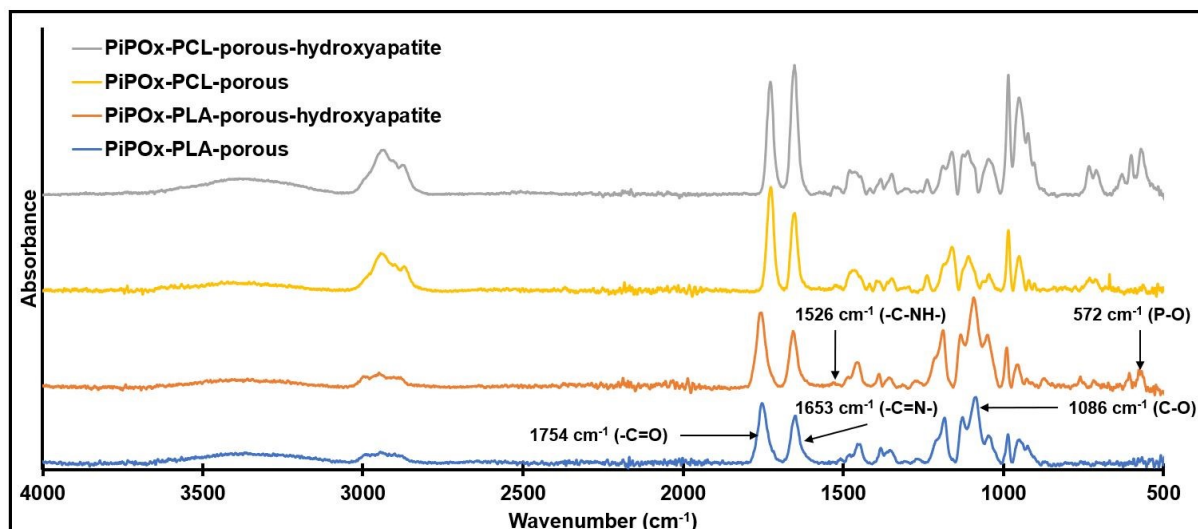

Figure S3. ATR FT-IR spectra of porous networks (dry state) obtained from PiPOx using HOOC-PLA<sub>3000</sub>-COOH and HOOC-PCL<sub>3000</sub>-COOH as crosslinker.

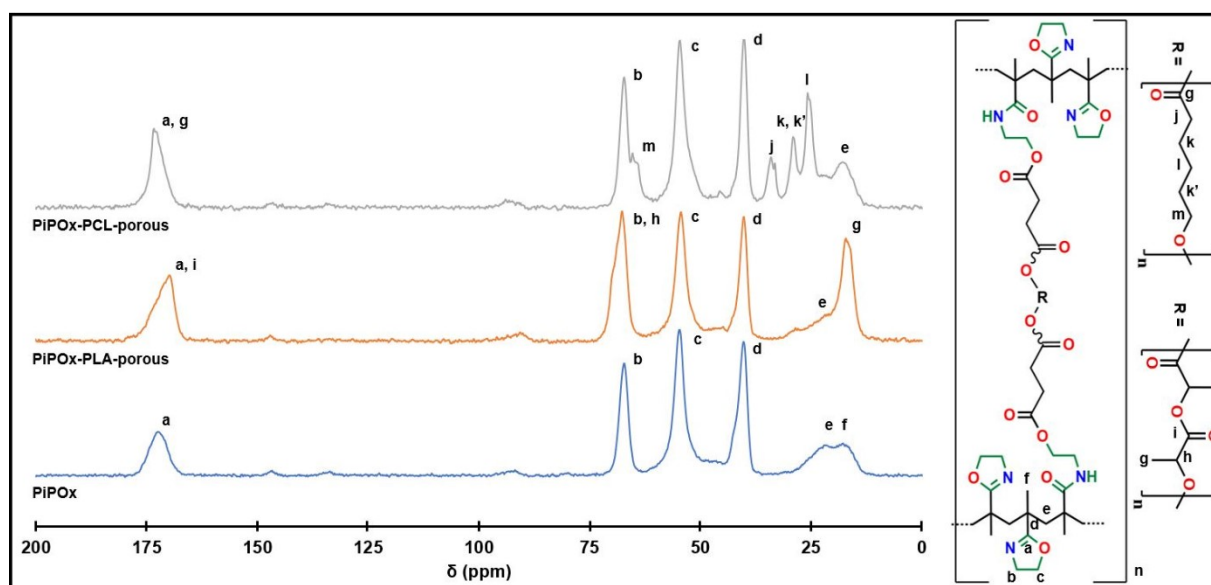

Figure S4. <sup>13</sup>C-CP/MAS spectra of porous networks (dry state) obtained from HOOC-PLA<sub>3000</sub>-COOH and HOOC-PCL<sub>3000</sub>-COOH as PiPOx crosslinker.

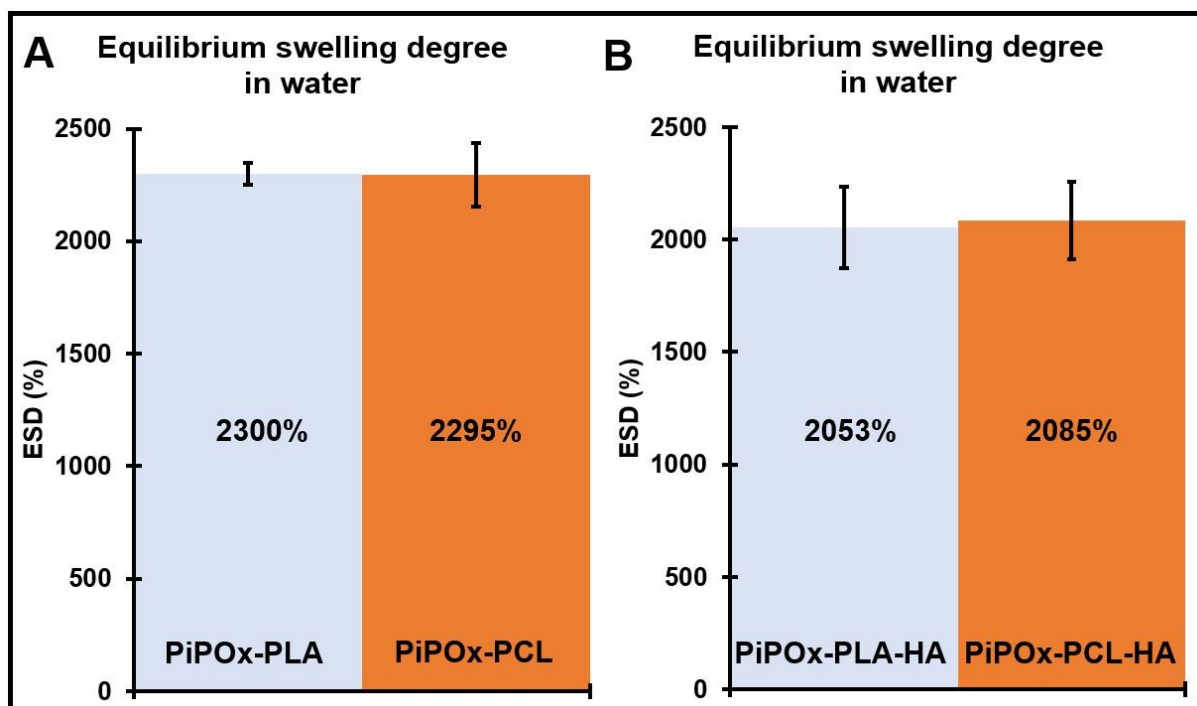

Figure S5. Swelling of porous PiPOx-PCL and PiPOx-PLA networks in water, A) networks obtained with salt A, B) networks obtained with salt B and hydroxyapatite.

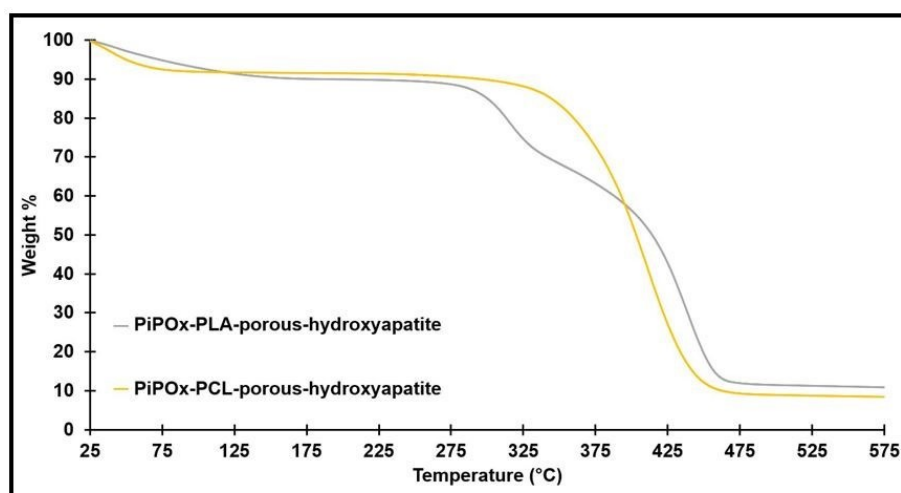

Figure S6. TGA analysis of PiPOx-PLA and PiPOx-PCL porous networks with hydroxyapatite particles.

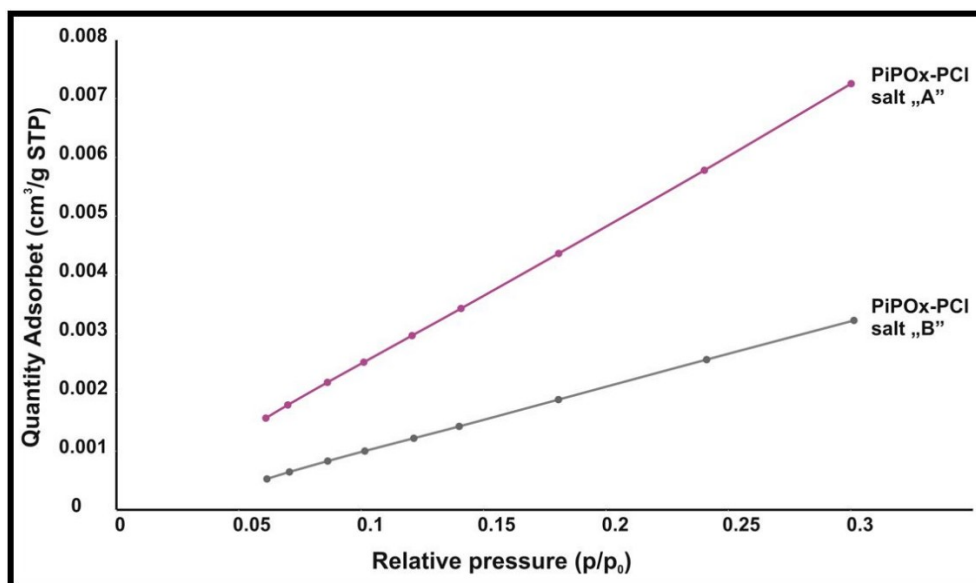

Figure S7. Krypton adsorption isotherms for porous PiPOx-PCL networks prepared with salt “A” and “B”.
